# Supplementary material for: Turing Patterning Using Gene Circuits with Gas-Induced Degradation of Quorum Sensing Molecules
Source: PubMed Central journal article supplement (PMC4858293; doi:10.1371/journal.pone.0153679), 2016-05-05
Supplement: pone.0153679.s001.pdf [file pone.0153679.s001.pdf]

| Parameter  | Value  |
|------------|--------|
| $\alpha_1$ | 4.5    |
| $\alpha_2$ | 1.667  |
| $\alpha_3$ | 3.0    |
| $\gamma_1$ | 3.0    |
| $\gamma_2$ | 2.0    |
| $\gamma_3$ | 1.1    |
| $\delta_1$ | 0.04   |
| $\delta_2$ | 0.0202 |
| $\delta_3$ | 0.0    |
| $k_{PL}$   | 0.675  |
| $k_{LD}$   | 0.01   |
| $k_{PH}$   | 0.675  |
| $k_{HA}$   | 0.675  |
| $k_1$      | 100    |
| $k_2$      | 248.5  |
| $P_m$      | 1.0    |
| $D$        | 100    |
