# Supplementary material for: Turing Patterning Using Gene Circuits with Gas-Induced Degradation of Quorum Sensing Molecules
Source: PubMed Central journal article supplement (PMC4858293; doi:10.1371/journal.pone.0153679), 2016-05-05
Supplement: pone.0153679.s003.pdf [file pone.0153679.s003.pdf]

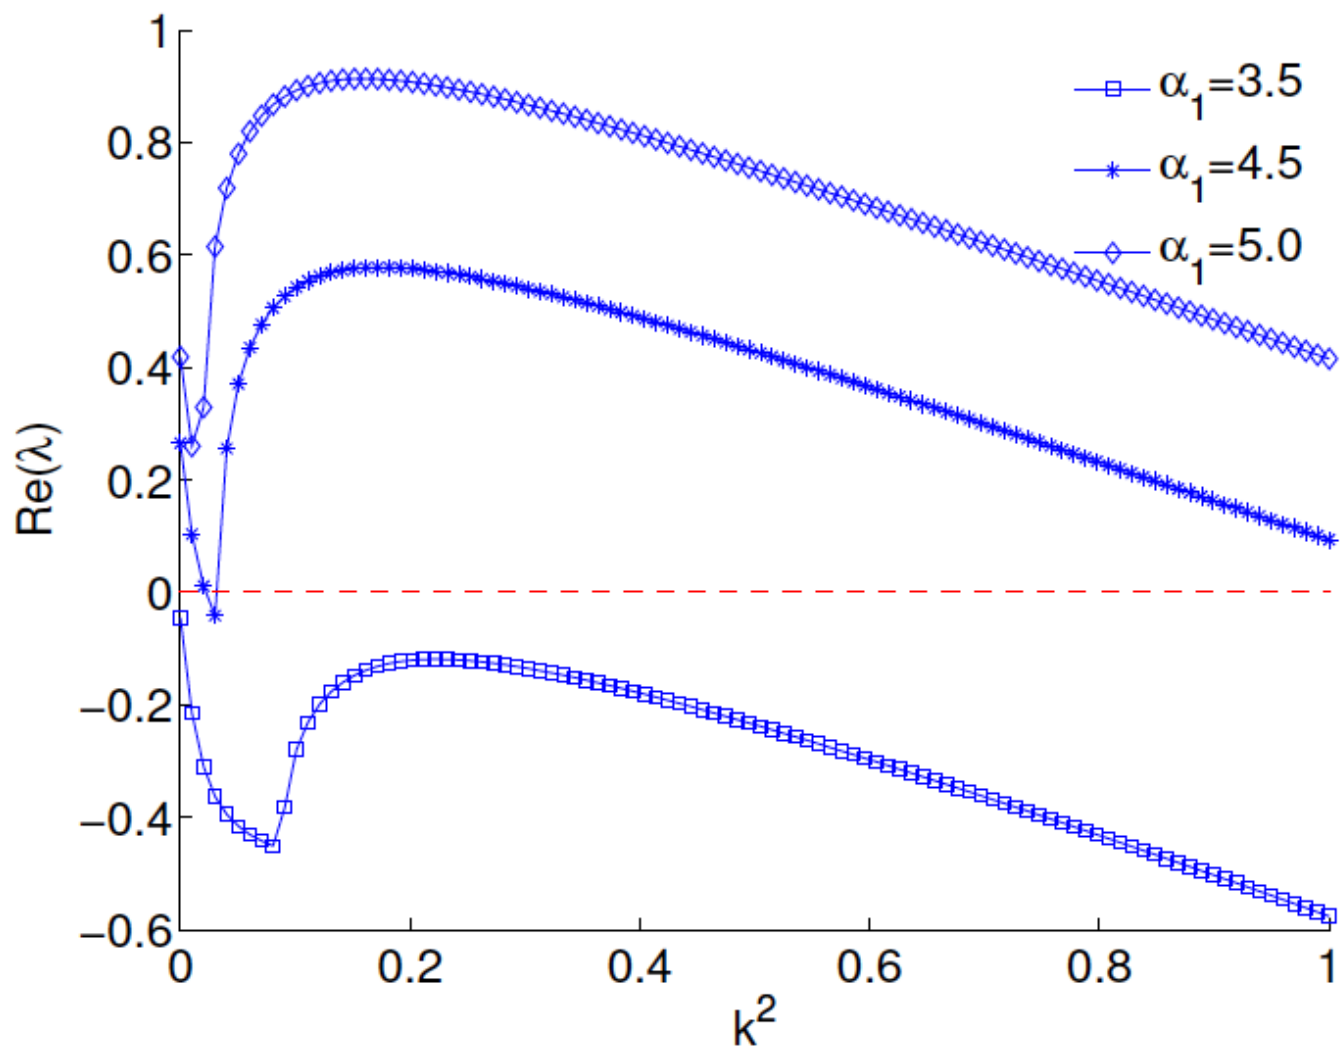

(a)

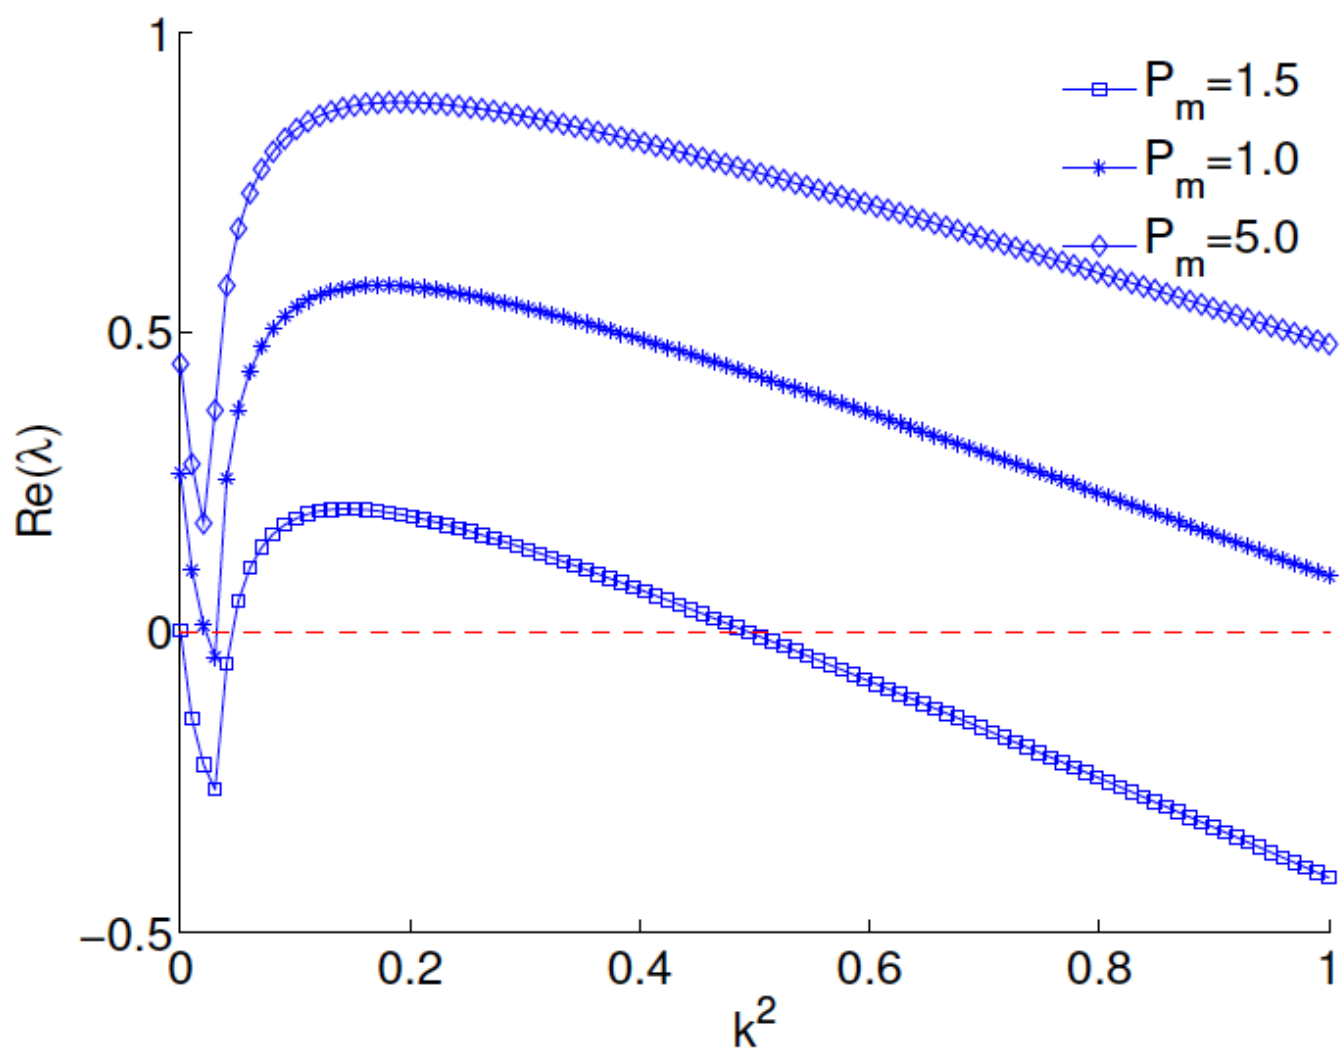

(b)
